# Supplementary material for: Epicutaneous administration of the pattern recognition receptor agonist polyinosinic–polycytidylic acid activates the MDA5/MAVS pathway in Langerhans cells
Source: PubMed Central journal article supplement (PMC6053315; doi:10.1096/fj.201701090r), 2018-03-06

S.5

A

p(I:C)

30 min

1 h

2 h

3 h

IFR3xH

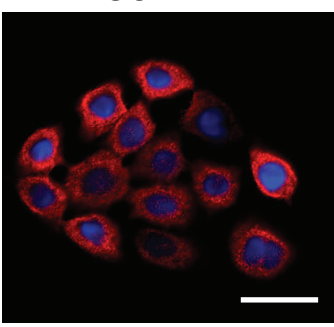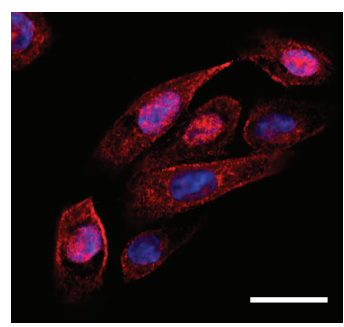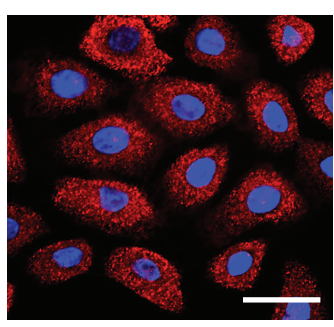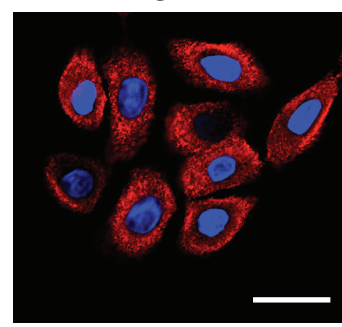

IFR3

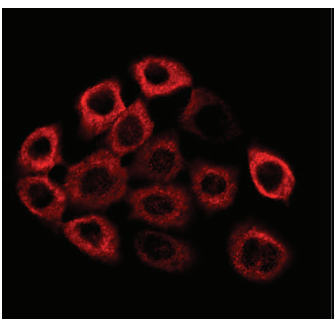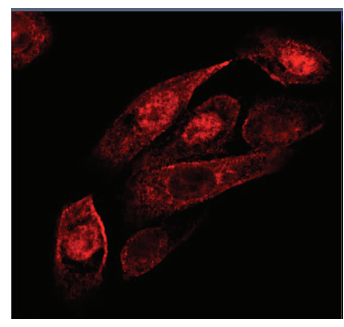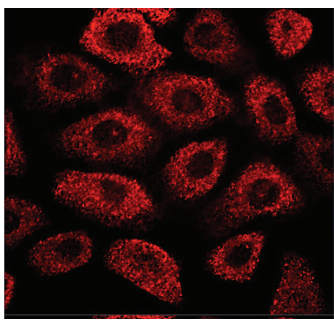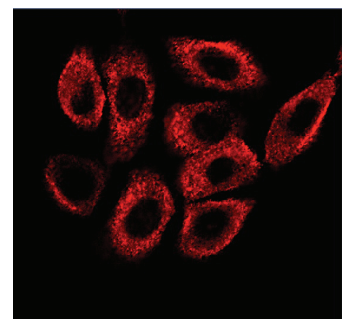

B

p(I:C)

1 h

2 h

3 h

16 h

p65xH

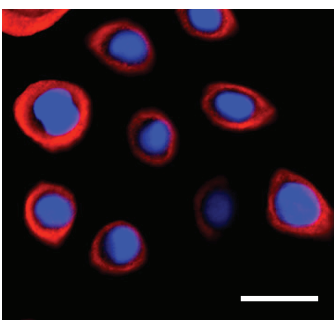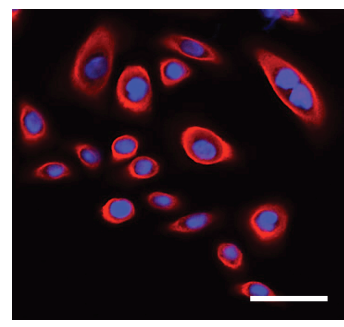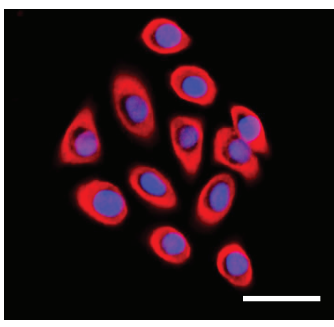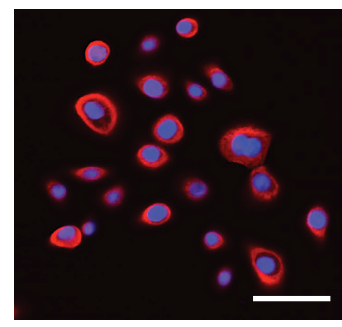

p65

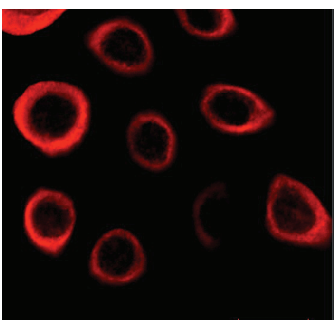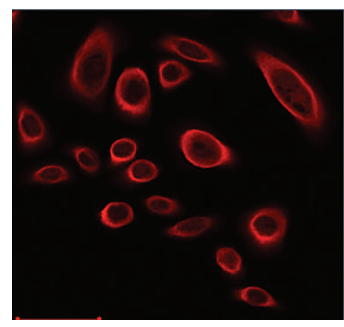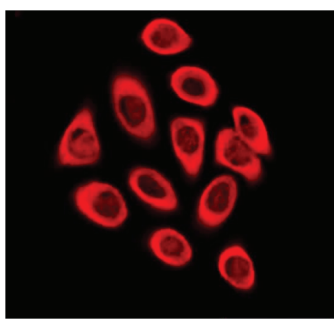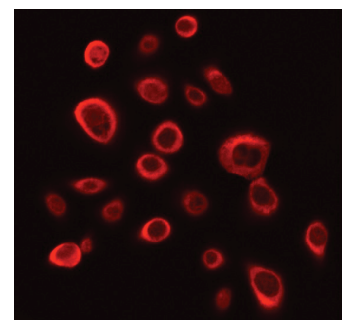

Supplement: fj.201701090R.sf5.pdf [file fj.201701090R.sf5.pdf]
