# Supplementary material for: Epicutaneous administration of the pattern recognition receptor agonist polyinosinic–polycytidylic acid activates the MDA5/MAVS pathway in Langerhans cells
Source: PubMed Central journal article supplement (PMC6053315; doi:10.1096/fj.201701090r), 2018-03-06

# S.6

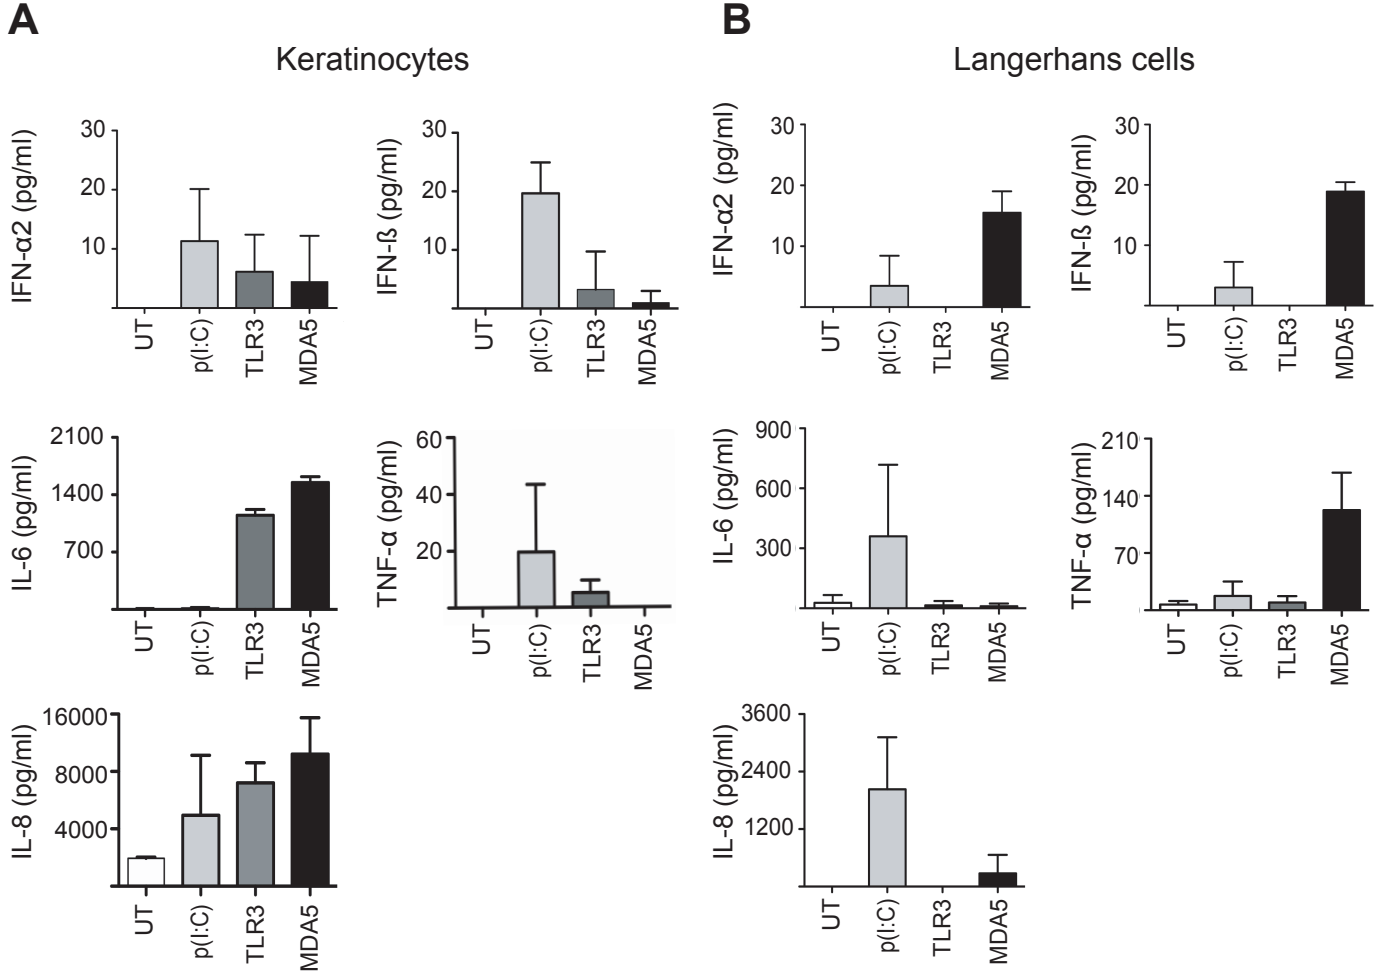

Supplement: fj.201701090R.sf6.pdf [file fj.201701090R.sf6.pdf]
